# Supplementary material
Source: PubMed Central journal article supplement (PMC4225583)
Supplement: mmc1.pdf [file mmc1.pdf]

The American Journal of Human Genetics, Volume 95

Supplemental Data

## **Mutations in *PURA* Cause Profound Neonatal Hypotonia, Seizures, and Encephalopathy in 5q31.3 Microdeletion Syndrome**

Seema R. Lalani, Jing Zhang, Christian P. Schaaf, Chester W. Brown, Pilar Magoulas, Anne Chun-Hui Tsai, Areeg El-Gharbawy, Klaas J. Wierenga, Dennis Bartholomew, Chin-To Fong, Tina Barbaro-Dieber, Mary K. Kukolich, Lindsay C. Burrage, Elise Austin, Kory Keller, Matthew Pastore, Fabio Fernandez, Timothy Lotze, Angus Wilfong, Gabriela Purcarin, Wenmiao Zhu, William J. Craigen, Marianne McGuire, Mahim Jain, Erin Cooney, Mahshid Azamian, Matthew N. Bainbridge, Donna M. Muzny, Eric Boerwinkle, Richard E. Person, Zhiyv Niu, Christine M. Eng, James R. Lupski, Richard A. Gibbs, Arthur L. Beaudet, Yaping Yang, Meng C. Wang, and Fan Xia

CLUSTAL O(1.2.1) multiple sequence alignment

```

sp|Q00577|PURA_HUMAN      MADRDSGSEQGGAAALGSGGSLGHPGSGSGSGGGGGGGGGGGGGGGGGGGGAPGGLQHETQE 60
sp|P42669|PURA_MOUSE     MADRDSGSEQGGAAALGSGGSLGHPGSGSGSGGGGGGGGGGGGGGGSG-GGGGAPGGLQHETQE 59
tr|Q9V4D9|PUR-A_DROME     MSDLGSDD-----GISGSKYNVANM-----EGSSSRNDFDSSAKGGSGVEQE 43
tr|Q94230|PLP-1_CAEL      -----MSDGSVERGTRKRAEDS 16
                                     . * . :.

sp|Q00577|PURA_HUMAN      LASKRVDIQNKRFYLDVKQNAKGRFLKTAEVGAGGNKSRLLTSMMSVAVEFRDYLGDFIEH 120
sp|P42669|PURA_MOUSE     LASKRVDIQNKRFYLDVKQNAKGRFLKIAEVGAGGNKSRLLTSMMSVAVEFRDYLGDFIEH 119
tr|Q9V4D9|PUR-A_DROME     LATKMLQIQSKRFYLDVKQNRGRFIKVAEIGADGRRSQIYLALSTAAEFRDHLSSFSDY 103
tr|Q94230|PLP-1_CAEL      LATHQLTVQYKRYIDVNTGRYIKIAELGTNY-KSRIILSIVAAKAIVSEIS---KM 72
***: : : * **:*:*:*: * :***:*:*:*: * :*:: *:: * * : . : .

sp|Q00577|PURA_HUMAN      YAQLGPSQPPDLAQAQDEPRRALKSEFLVRENKYYMDLKENQRGRFLRIRQTVNRGPGI 180
sp|P42669|PURA_MOUSE     YAQLGPSQPPDLAQAQDEPRRALKSEFLVRENKYYMDLKENQRGRFLRIRQTVNRGPGI 179
tr|Q9V4D9|PUR-A_DROME     YASLGPPNTDNLPE-----DGKLGKSEMMIKDYRRYYLDLKENARGRFLRVSQTITRGGF 157
tr|Q94230|PLP-1_CAEL      LALIDEPS---TGEHAPKESSLIKSETLNVLDGRKFYVDLKENVGRFLRIAQMPMN---- 125
* : . : : :***: : *:*:*:*:* * * * * * : *

sp|Q00577|PURA_HUMAN      GSTQGQTIALPAQGLIEFRDALAKLIDDYGVEEE---PAELPEGTSLTVDNKRFFFDVGS 237
sp|P42669|PURA_MOUSE     GSTQGQTIALPAQGLIEFRDALAKLIDDYGVEEE---PAELPEGTSLTVDNKRFFFDVGS 236
tr|Q9V4D9|PUR-A_DROME     ---RSQIALPAQGMIEFRDALTDLLEEFGANDGGRFKGDLPEERHMKVDNKNFYFDIGQ 213
tr|Q94230|PLP-1_CAEL      PRQTRQQIAIPSDGIAEIHKVLTEYLAKEGEGHE---QENTNTPKITAENKSFLFHSGK 181
. **:*:*:*: *:. . * . : : : : * * * * *

sp|Q00577|PURA_HUMAN      NKYGVFMRVSEVK--PTYRNSITVPYKVVAKFGHTFCKYSEEMKKIQEKQREKRAACEQL 295
sp|P42669|PURA_MOUSE     NKYGVFMRVSEVK--PTYRNSITVPYKVVAKFGHTFCKYSEEMKKIQEKQREKRAACEQL 294
tr|Q9V4D9|PUR-A_DROME     NNRGVYMRVSEVK--NNEFRTSITPEKWCWIRFDIFNDYCEKMKKSSDSITAEINLPTSS 271
tr|Q94230|PLP-1_CAEL      NDRGEFVRISEIKLNSGYRNAITVPMSALVDFRKELDNI IANQGK----- 226
* . * :*:***: * :*:*:*: * . : . : *

sp|Q00577|PURA_HUMAN      HQQQQQQQEETAAATLLLQGEEEGEED 322
sp|P42669|PURA_MOUSE     HQQQQQQQEETTAATLLLLQGEEEGEED 321
tr|Q9V4D9|PUR-A_DROME     NSLK----- 275
tr|Q94230|PLP-1_CAEL      ----- 226

```

'\*' Identical      ':' Strongly conserved      '.' Moderately conserved

■ PUR motif      ■ Mutated as missense or inframeshift in affected individuals

■ Critical amino acids suggested by X-ray structure      ■ Missense changes by benign SNPs

**Figure S1.** Sequence alignment of PURA family proteins in human (Q00577), mouse (P42669), *Drosophila* (Q9V4D9) and *C. elegans* (Q94230). The sequences were from the UniProt database (<http://www.uniprot.org/>).

## *C. elegans* chromosome IV

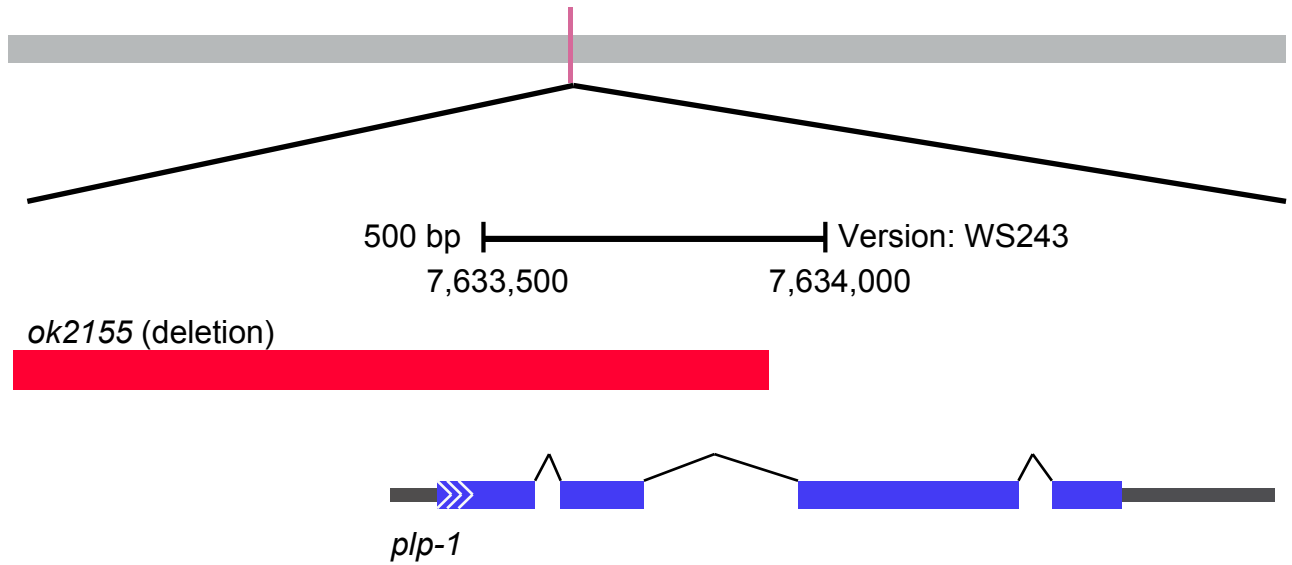

**Figure S2.** Genomic structure of the *plp-1* gene in *C. elegans* and the *ok2155* deletion allele (red). Derived from Wormbase (<http://www.wormbase.org/>).

*PURA* expression in major human tissues

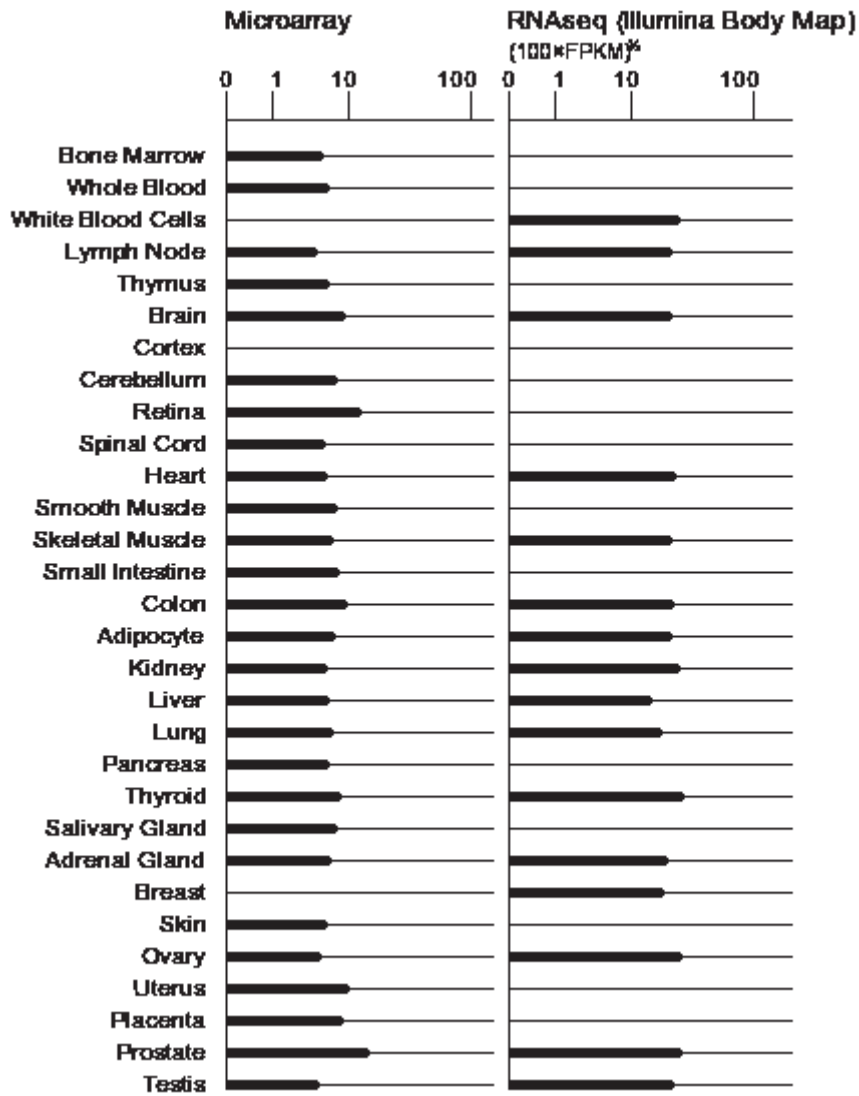

From <http://www.genecards.org/>

**Figure S3.** Expression pattern of *PURA* indicated by public microarray and RNA-seq data. The bars show the relative levels of *PURA* mRNA in major tissues. Derived from GeneCards® (<http://www.genecards.org/>).

Table S2. *In silico* predictions of missense *PURA* mutations

| Gene        | RefSeq ID   | cDNA     | Protein     | SIFT Score | SIFT Effect | PolyPhen2 Score | PolyPhen2 Effect  |
|-------------|-------------|----------|-------------|------------|-------------|-----------------|-------------------|
| <i>PURA</i> | NM_005859.4 | c.265G>C | p.Ala89Pro  | 0          | Damaging    | 1               | Probably damaging |
| <i>PURA</i> | NM_005859.4 | c.289A>G | p.Lys97Glu  | 0          | Damaging    | 1               | Probably damaging |
| <i>PURA</i> | NM_005859.4 | c.299T>C | p.Leu100Pro | 0          | Damaging    | 1               | Probably damaging |
| <i>PURA</i> | NM_005859.4 | c.470T>A | p.Met157Lys | 0          | Damaging    | 0.954           | Possibly damaging |
| <i>PURA</i> | NM_005859.4 | c.596G>C | p.Arg199Pro | 0          | Damaging    | 1               | Probably damaging |
